# Supplementary material
Source: publisher site journal article supplement (https://www.dovepress.com/article/500316)
Supplement: Supplementary file 1 [file get_supplementary_file.php]

**Table S1** Linear mixed model evaluating NRS pain score at rest over time

| **Effect** | **Coefficient** | **95% CI** | **SE** | **p value** |
| --- | --- | --- | --- | --- |
| Intercept | 2.541 | 2.351 to 2.732 | 0.097 | < 0.001 |
| Time | -0.015 | -0.019 to -0.010 | 0.002 | < 0.001 |
| Treatment | -1.839 | -2.109 to -1.570 | 0.138 | < 0.001 |
| Treatment × Time | 0.043 | 0.037 to 0.050 | 0.003 | < 0.001 |

Abbreviations:NRS, Numeric Rating Scale.

**Table S2** Linear mixed model evaluating NRS pain score during coughing over time

| **Effect** | **Coefficient** | **95% CI** | **SE** | **p value** |
| --- | --- | --- | --- | --- |
| Intercept | 4.495 | 4.278 to 4.712 | 0.111 | < 0.001 |
| Time | -0.029 | -0.035 to -0.023 | 0.003 | < 0.001 |
| Treatment | -2.557 | -2.864 to -2.250 | 0.157 | < 0.001 |
| Treatment × Time | 0.068 | 0.060 to 0.077 | 0.004 | < 0.001 |

Abbreviations: NRS, Numeric Rating Scale.

**Table S3** Estimated marginal means of NRS pain scores at rest

| **Time point** | **∆Emmean** | **SE** | **95% CI** | **p value** |
| --- | --- | --- | --- | --- |
|
| Postop 0.5 h | 1.282 | 0.185 | 0.918 to 1.646 | < 0.001 |
| Postop 1 h | 1.615 | 0.185 | 1.252 to 1.979 | < 0.001 |
| Postop 2 h | 1.692 | 0.185 | 1.329 to 2.056 | < 0.001 |
| Postop 4 h | 2.154 | 0.185 | 1.790 to 2.517 | < 0.001 |
| Postop 8 h | 2.128 | 0.185 | 1.765 to 2.492 | < 0.001 |
| Postop 12 h | 1.385 | 0.185 | 1.021 to 1.748 | < 0.001 |
| Postop 24 h | 0.513 | 0.185 | 0.149 to 0.876 | 0.006 |
| Postop 36 h | -0.179 | 0.185 | -0.543 to 0.184 | 0.332 |
| Postop 48 h | 0.103 | 0.185 | -0.261 to 0.466 | 0.579 |

Note: R package ‘emmeans’ was used to obtain estimated marginal means (EMMs) for the linear mixed model.

Abbreviations: NRS, Numeric Rating Scale; Emmean, Estimated Marginal Mean.

**Table S4** Estimated marginal means of NRS pain scores during coughing

| **Time point** | **∆Emmean** | **SE** | **95% CI** | **p value** |
| --- | --- | --- | --- | --- |
|
| Postop 0.5 h | 2.282 | 0.204 | 1.881 to 2.683 | < 0.001 |
| Postop 1 h | 2.359 | 0.204 | 1.958 to 2.760 | < 0.001 |
| Postop 2 h | 2.564 | 0.204 | 2.163 to 2.965 | < 0.001 |
| Postop 4 h | 2.615 | 0.204 | 2.214 to 3.016 | < 0.001 |
| Postop 8 h | 2.590 | 0.204 | 2.189 to 2.991 | < 0.001 |
| Postop 12 h | 1.718 | 0.204 | 1.317 to 2.119 | < 0.001 |
| Postop 24 h | 0.026 | 0.204 | -0.375 to 0.427 | 0.900 |
| Postop 36 h | -0.282 | 0.204 | -0.683 to 0.119 | 0.167 |
| Postop 48 h | -0.103 | 0.204 | -0.503 to 0.298 | 0.615 |

Note: R package ‘emmeans’ was used to obtain estimated marginal means (EMMs) for the linear mixed model.

Abbreviations: NRS, Numeric Rating Scale; Emmean, Estimated Marginal Mean.


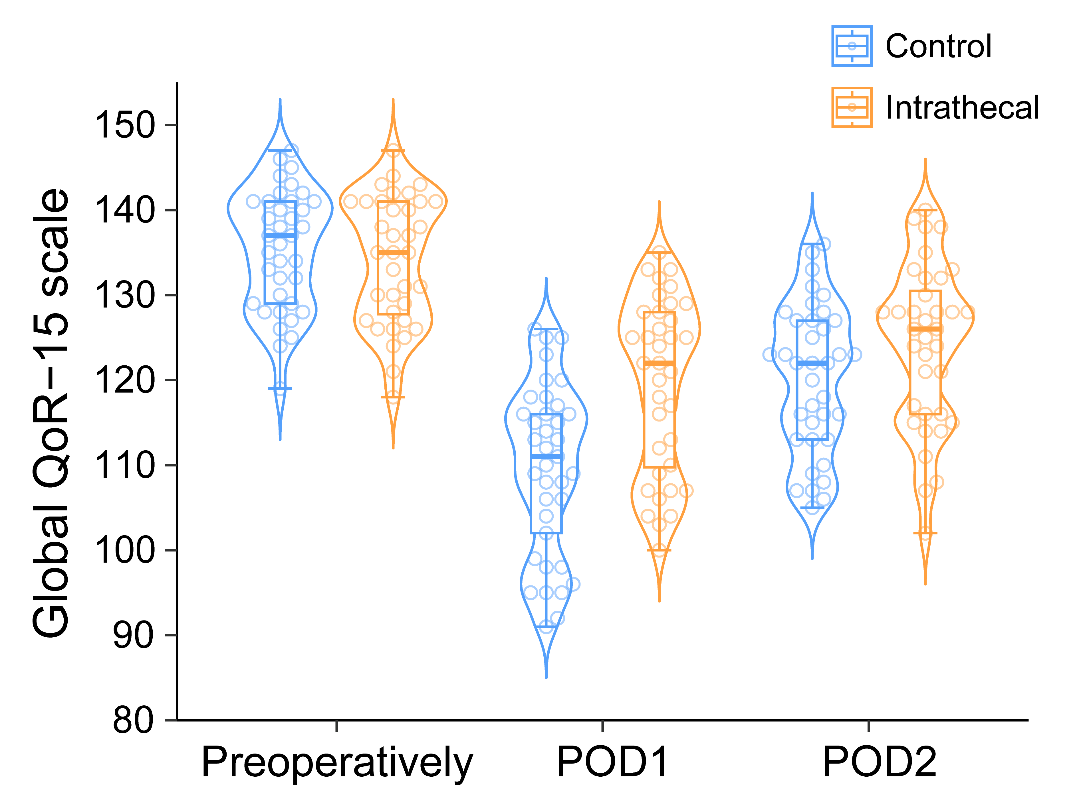


**Figure S1.** Per-protocol analysis of Quality of Recovery-15 (QoR-15) scores over time.

Beeswarm-violin plots display QoR-15 score distributions for control (blue) and intrathecal (orange) groups at pre-operative, 24 h (POD 1), and 48 h (POD 2) timepoints. Individual data points appear as circles, with median values (horizontal line), interquartile ranges (box), and distribution boundaries (whiskers, 1.5 times IQR). Per-protocol analysis demonstrated significantly higher QoR-15 scores in the intrathecal group at 24h post-surgery (122 [109–128] vs 111 [101–117], p < 0.001; difference: 10 [95% CI 5–15]). This difference decreased and lost statistical significance at 48h (126 [116–131] vs 122 [113–127], p = 0.062; difference: 4 [95% CI 0–9]).

Abbreviations: QoR-15: Quality of Recovery-15; POD: Postoperative Day; CI: Confidence Interval.

**
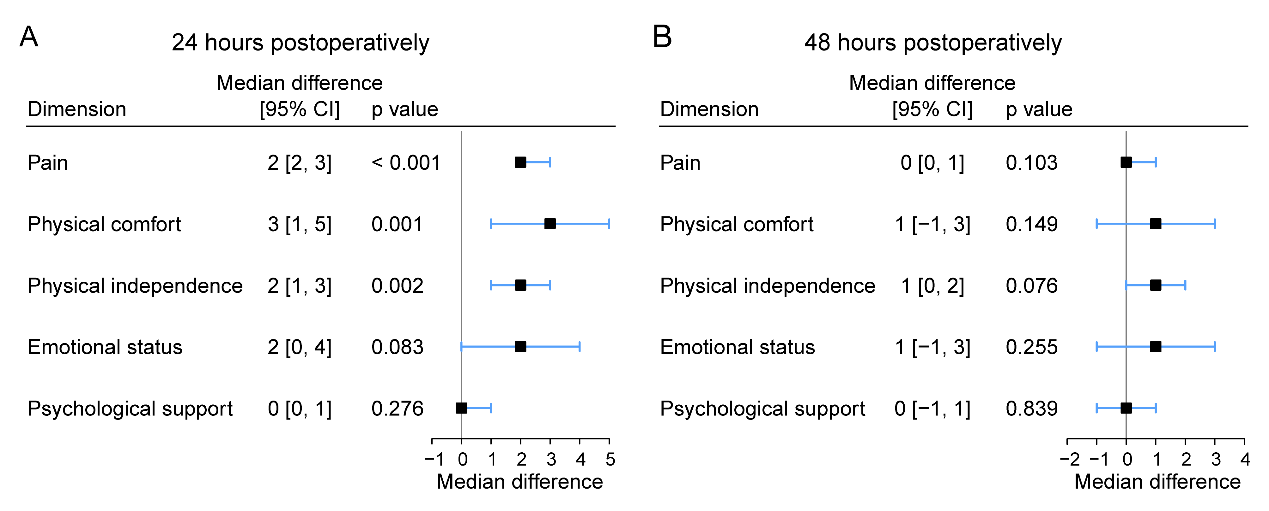
**

**Figure S2.** Quality of Recovery-15 (QoR-15) dimensional analysis at 24 and 48 hours postoperatively.

Forest plots illustrate median differences and 95% confidence intervals between intrathecal and control groups for each QoR-15 dimension at 24 hours (A) and 48 hours (B) post-surgery. The vertical zero line represents no between-group difference, with points to the right indicating higher intrathecal group scores. At 24 hours, the intrathecal group demonstrated significantly higher scores in pain, physical comfort, and physical independence dimensions (all p < 0.05), with pain showing the largest improvement. By 48 hours, these differences had diminished, though a positive trend persisted in the pain dimension.

Abbreviations: QoR-15: Quality of Recovery-15; CI: Confidence Interval.


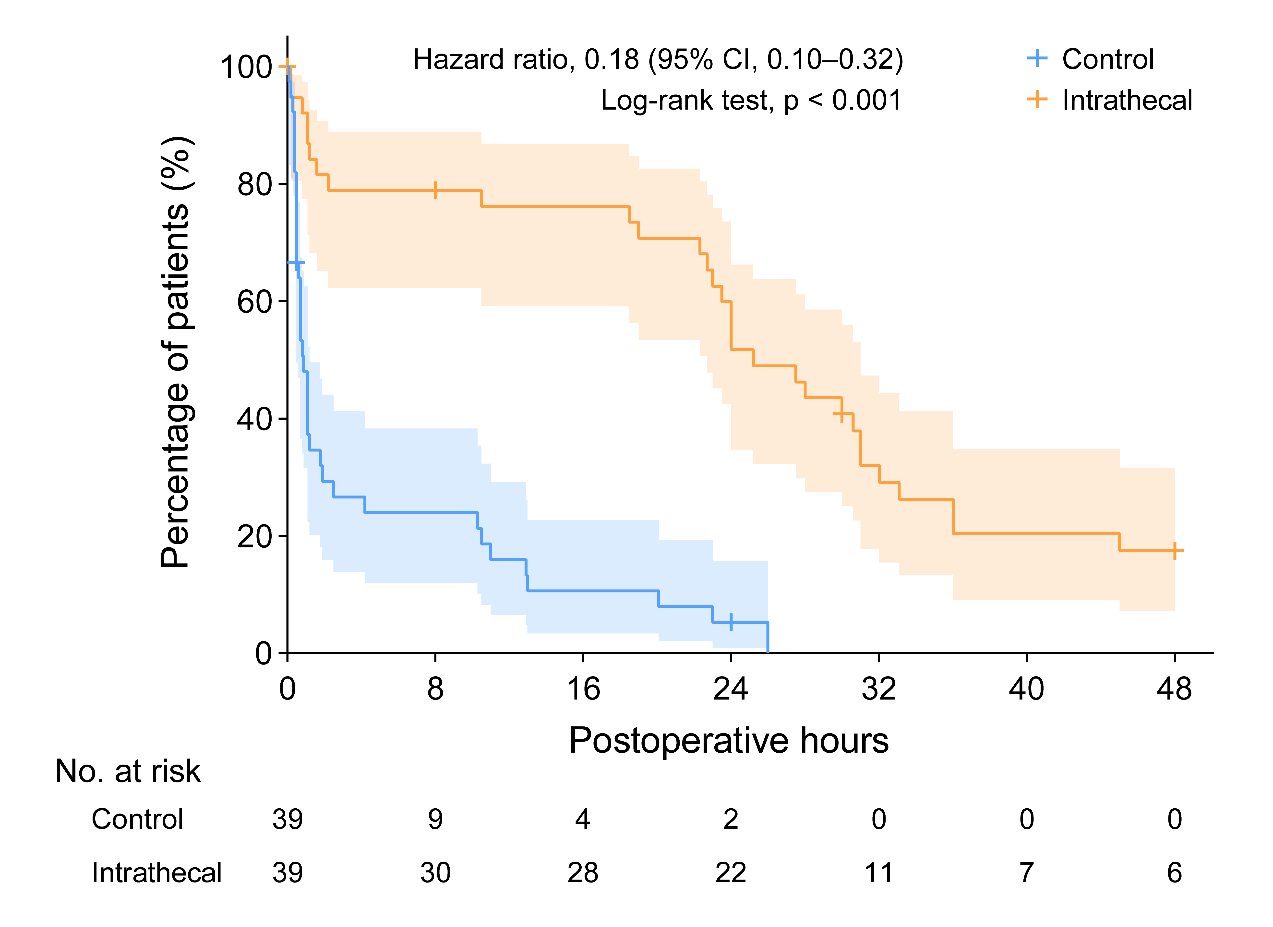


**Figure S3.** Time to first rescue analgesia requirement between study groups.

Kaplan-Meier curves demonstrate cumulative incidence of rescue analgesia requirement over 48 hours post-surgery for control (blue) and intrathecal (orange) groups. The analysis reveals significantly lower rescue analgesia needs in the intrathecal group (hazard ratio: 0.18, 95% CI 0.10–0.32; p < 0.001). Censored observations (+) indicate patients who did not require rescue analgesia during follow-up, with the intrathecal group maintaining a higher proportion of analgesia-free patients throughout the observation period.

Abbreviations: CI: Confidence Interval.


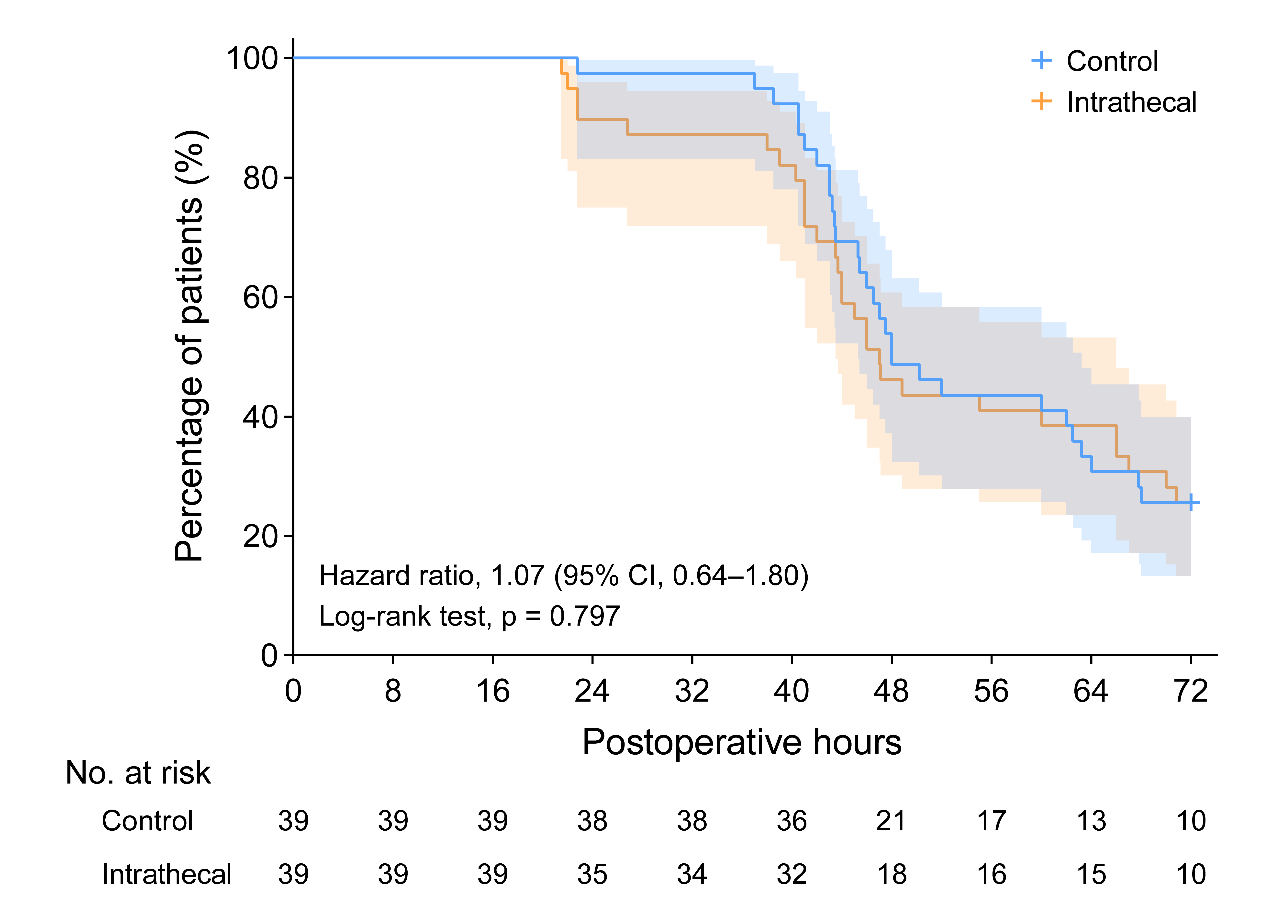


**Figure S4.** Time to diet resumption comparison between study groups.

Kaplan-Meier curves illustrate cumulative incidence of diet resumption over 72 hours post-surgery for control (blue) and intrathecal (orange) groups. The analysis shows no significant difference between groups in time to diet resumption (log-rank test, p = 0.797). Similar trajectory patterns suggest that intrathecal morphine intervention did not influence this recovery milestone. Censored observations (+) represent patients who had not resumed diet during the follow-up period.


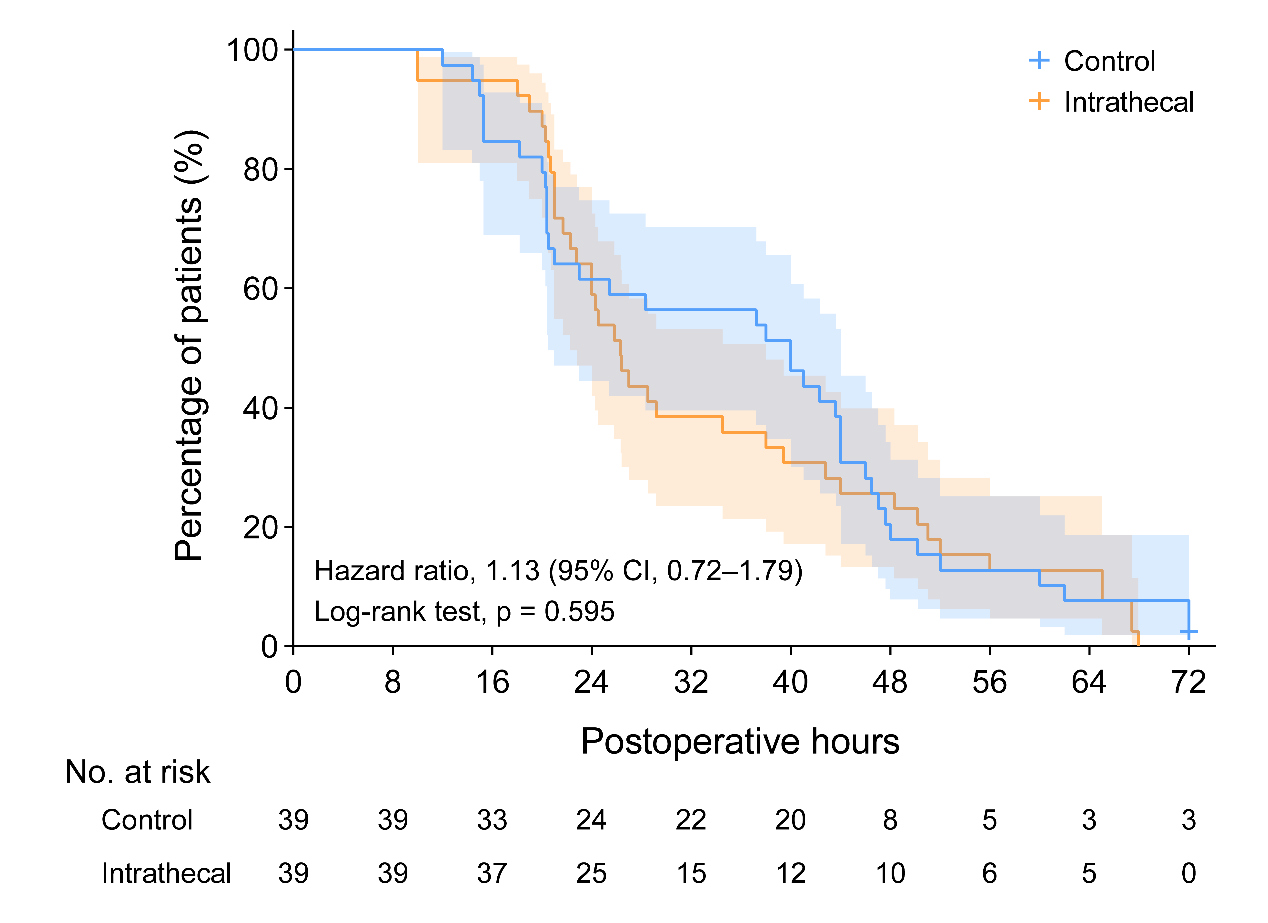


**Figure S5.** Time to first ambulation comparison between study groups.

Kaplan-Meier curves demonstrate cumulative incidence of first ambulation over 72 hours post-surgery for control (blue) and intrathecal (orange) groups. Analysis reveals no significant difference between groups (log-rank test, p = 0.595). Similar trajectory patterns indicate that intrathecal morphine intervention did not affect timing of this key recovery milestone. Censored observations (+) represent patients who had not achieved ambulation during the follow-up period.


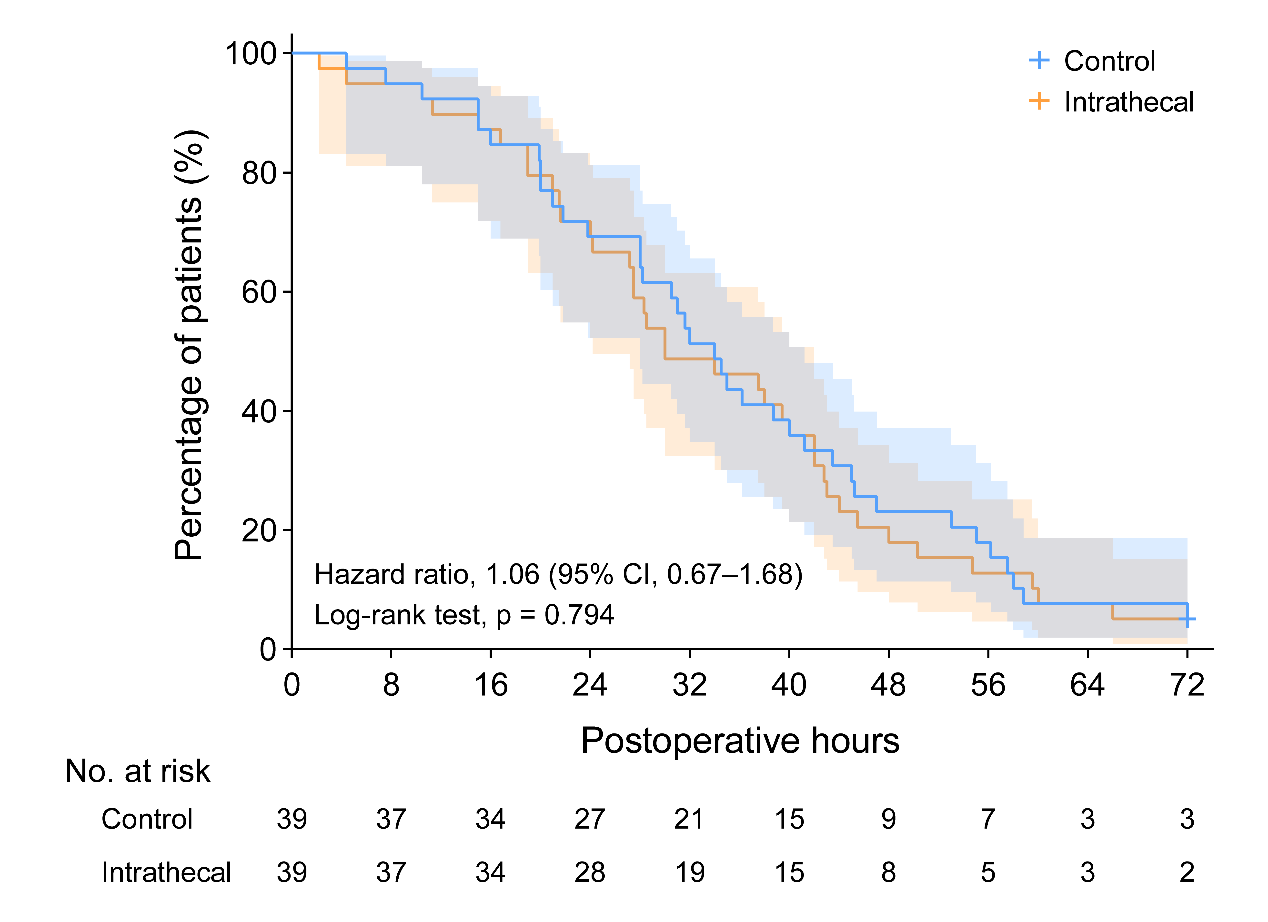


**Figure S6.** Time to first flatus comparison between study groups.

Kaplan-Meier curves illustrate cumulative incidence of first flatus over 72 hours post-surgery for control (blue) and intrathecal (orange) groups. Analysis shows no significant difference between groups (log-rank test, p = 0.794). Similar trajectory patterns indicate that intrathecal morphine intervention did not influence bowel function recovery timing. Censored observations (+) represent patients who had not experienced first flatus during the follow-up period.


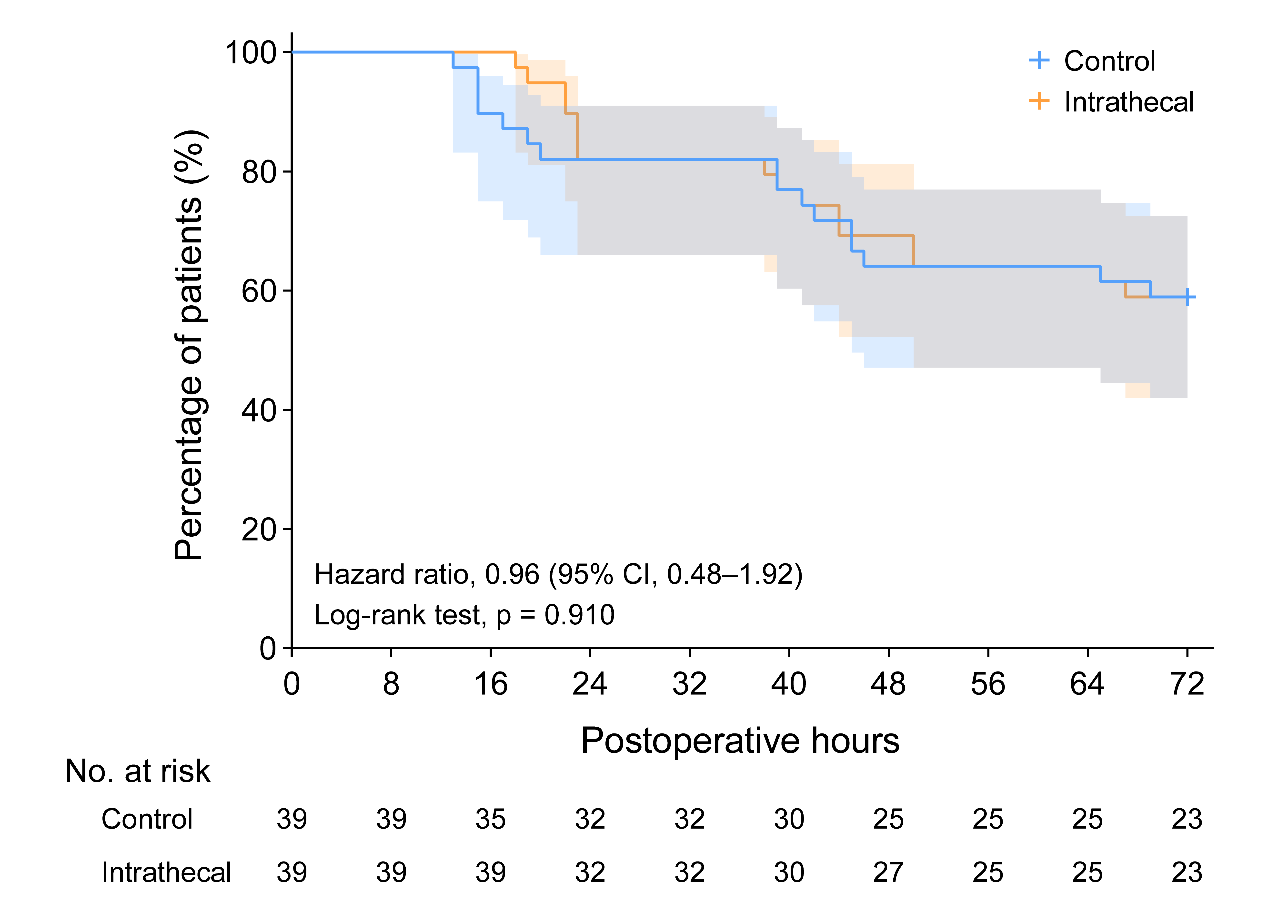


**Figure S7.** Time to urinary catheter removal comparison between study groups.

Kaplan-Meier curves demonstrate cumulative incidence of urinary catheter removal over 72 hours post-surgery for control (blue) and intrathecal (orange) groups. Analysis reveals no significant difference between groups (log-rank test, p = 0.910). Similar trajectory patterns indicate that intrathecal morphine intervention did not affect catheter removal timing during postoperative recovery. Censored observations (+) represent patients whose catheters remained in place during the follow-up period.
